# Supplementary material for: Molecular simulation investigation into the performance of Cu–BTC metal–organic frameworks for carbon dioxide–methane separations
Source: Royal Society of Chemistry journal article supplement (doi:10.1039/c1cp21761e), 2011-01-01
Supplement: c1cp21761e.pdf [file c1cp21761e.pdf]

## Supporting Information

# Molecular Simulation Investigation into the Performance of Cu-BTC Metal Organic Frameworks for Carbon Dioxide-Methane Separations

*Juan José Gutiérrez-Sevillano<sup>1</sup>, Alejandro Caro-Pérez<sup>1</sup>, David Dubbeldam<sup>2</sup>, and  
Sofía Calero<sup>1\*</sup>*

<sup>1</sup>Department of Physical, Chemical, and Natural Systems. University Pablo de Olavide.  
Ctra. Utrera km. 1. 41013 Seville, Spain.

<sup>2</sup>University of Amsterdam, Nieuwe Achtergracht 166, 1018 WV, Amsterdam, The  
Netherlands.

\* E-mail: scalero@upo.es

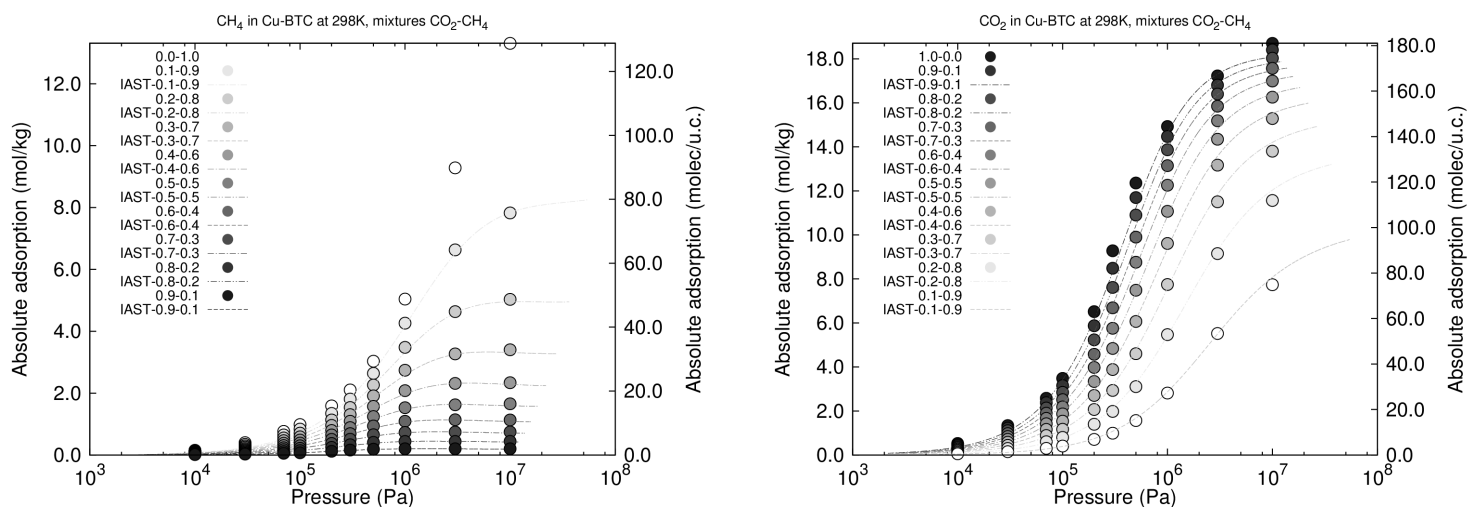

**Figure 1S:** Adsorption isotherms of methane (left) and carbon dioxide (right) obtained from GCMC (symbols) and from IAST (curves) for the different mixtures.

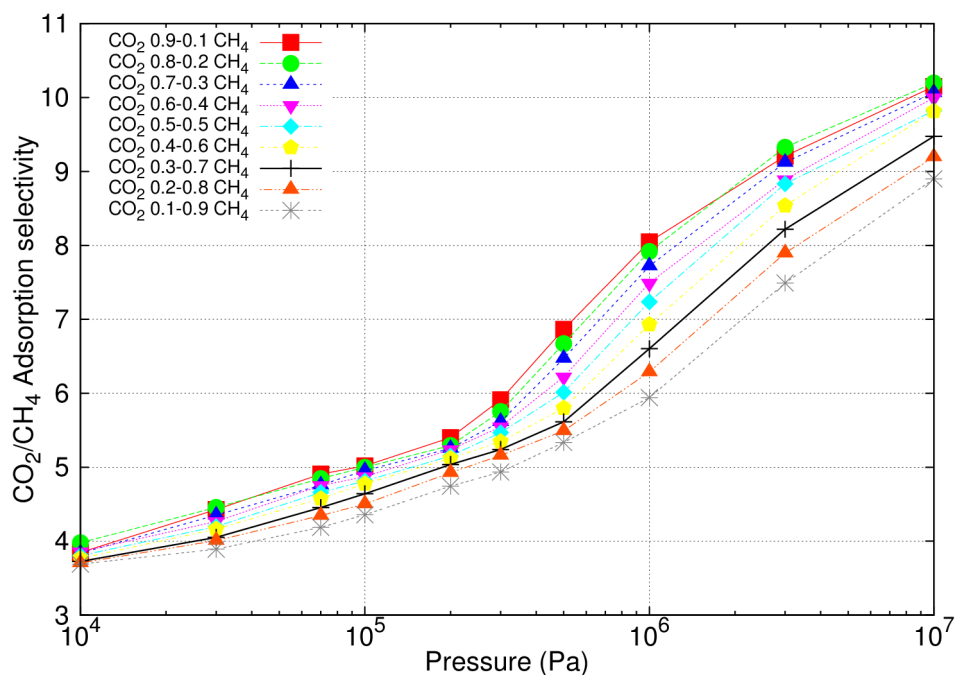

**Figure 2S:** Adsorption selectivity for the different mixtures of carbon dioxide and methane obtained from GCMC (symbols) and from IAST (curves).

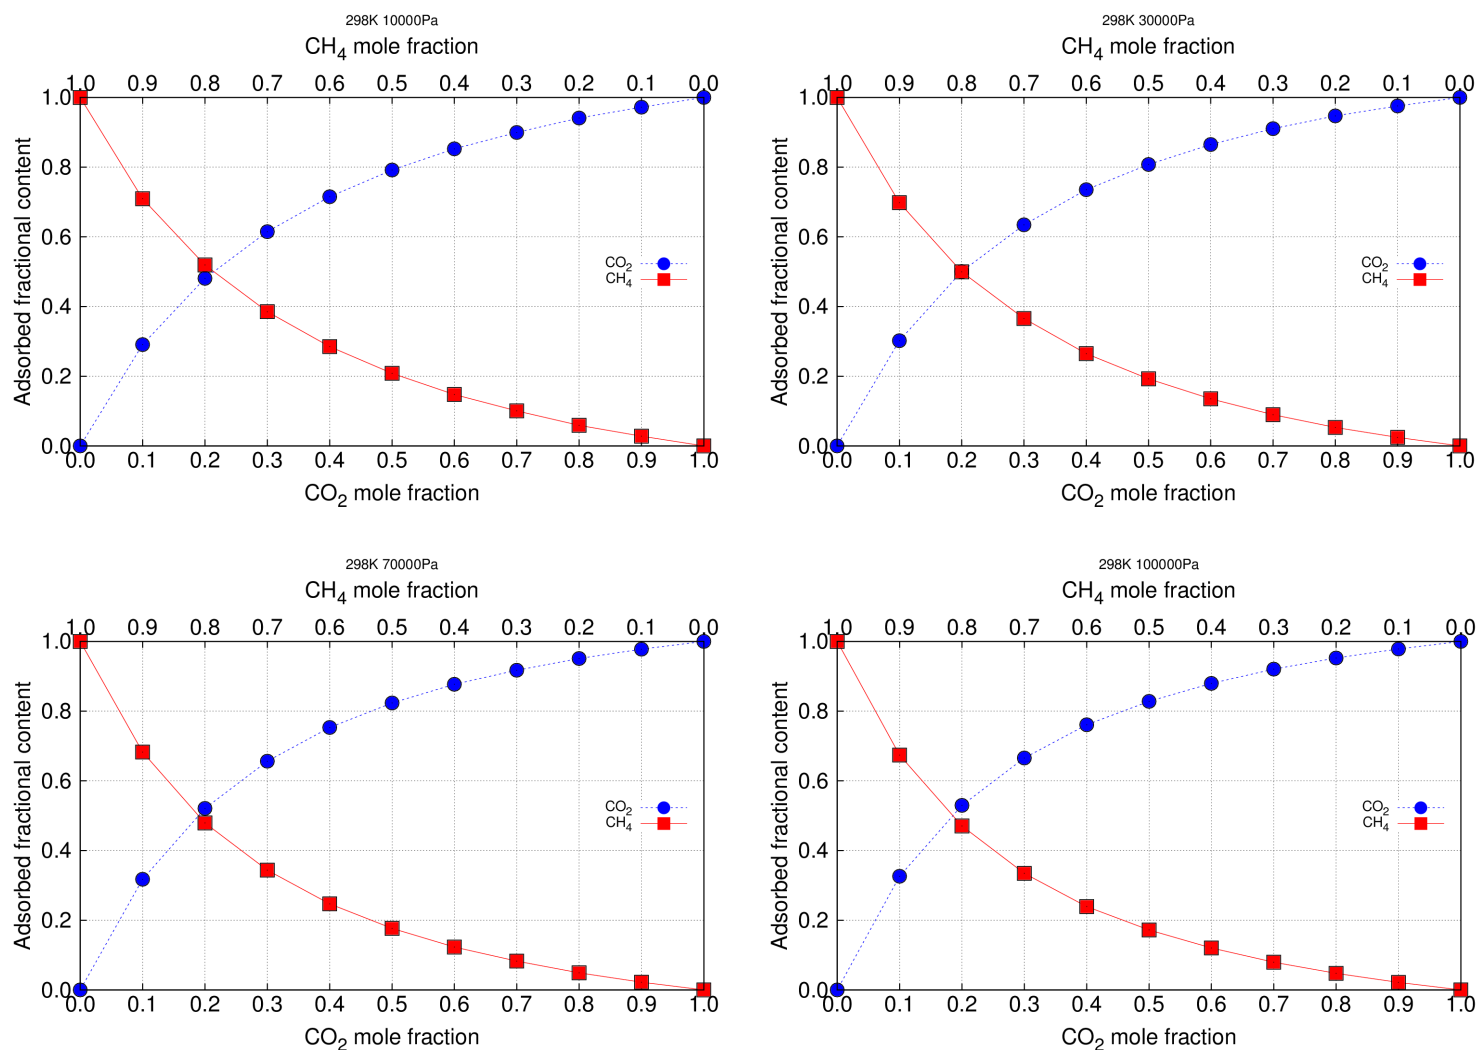

**Figure 3S.** Adsorbed fractional content of molecule against the same fraction in the external gas phase computed at 298 K and 10E4 Pa (top left), 3x10E4 Pa (top right), 7x10E4 Pa (bottom left), and 10E5Pa (bottom right)

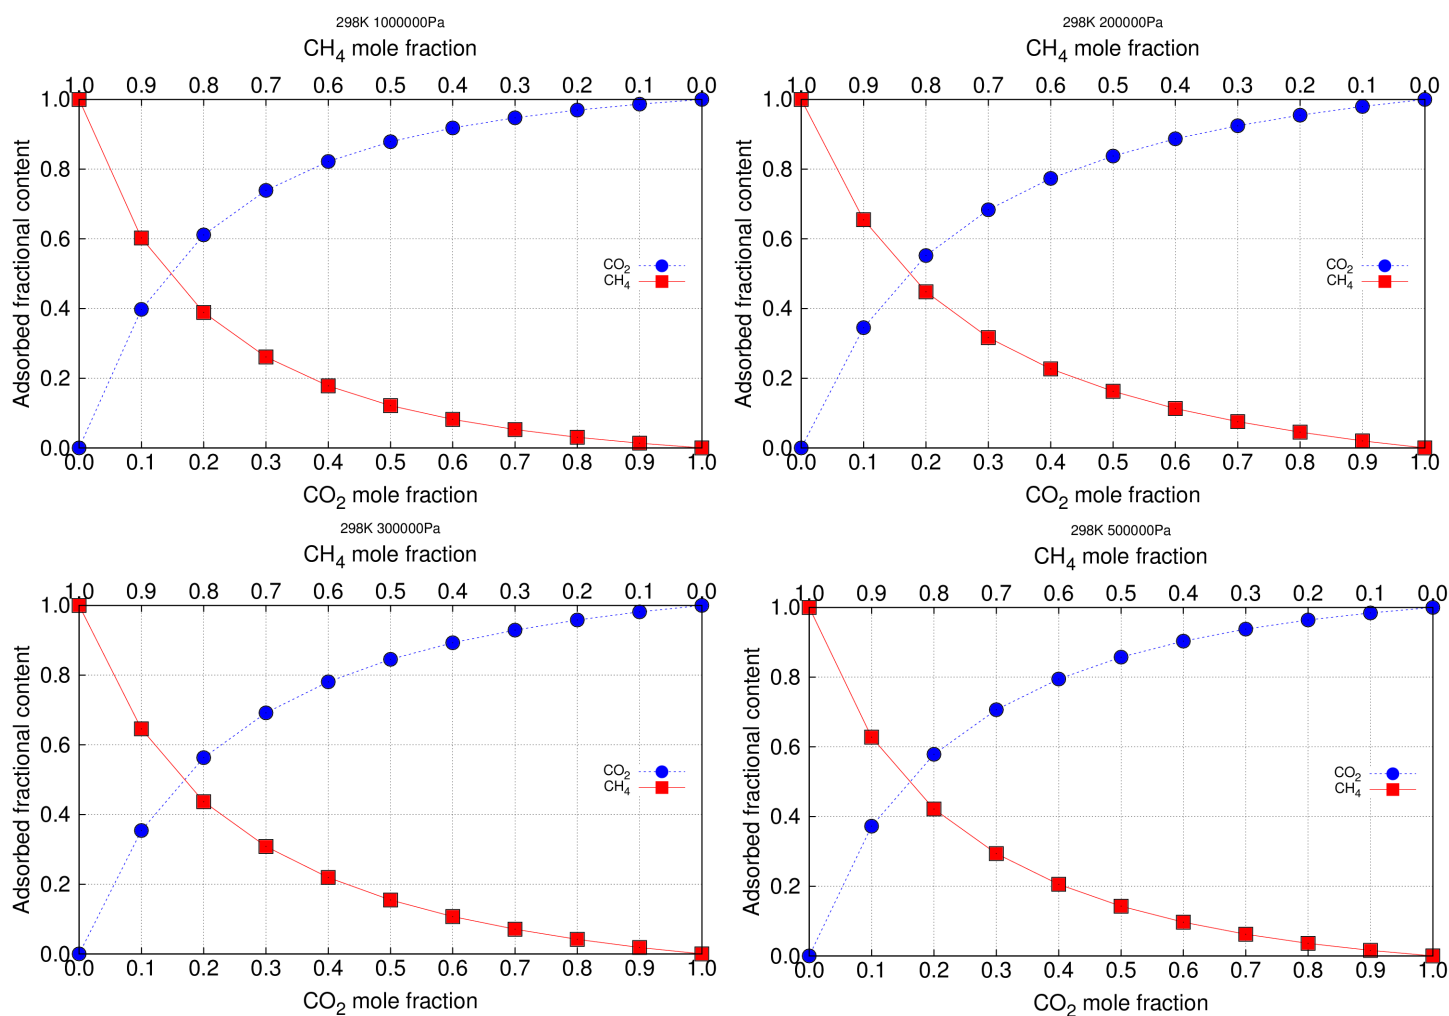

**Figure 4S.** Adsorbed fractional content of molecule against the same fraction in the external gas phase computed at 298 K and 2x10<sup>5</sup> Pa (top left), 3x10<sup>5</sup> Pa (top right), 5x10<sup>5</sup> Pa (bottom left), and 10x10<sup>5</sup> Pa (bottom right)

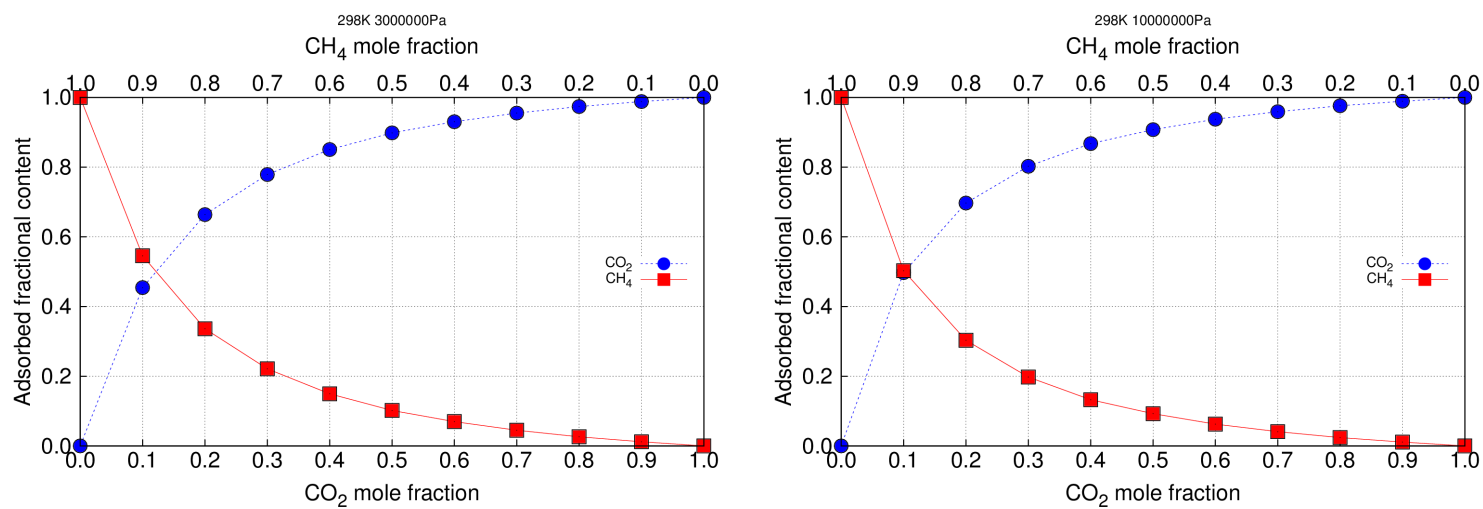

**Figure 5S.** Adsorbed fractional content of molecule against the same fraction in the external gas phase computed at 298 K and 3x10E6 Pa (left) and 10E7Pa (right)

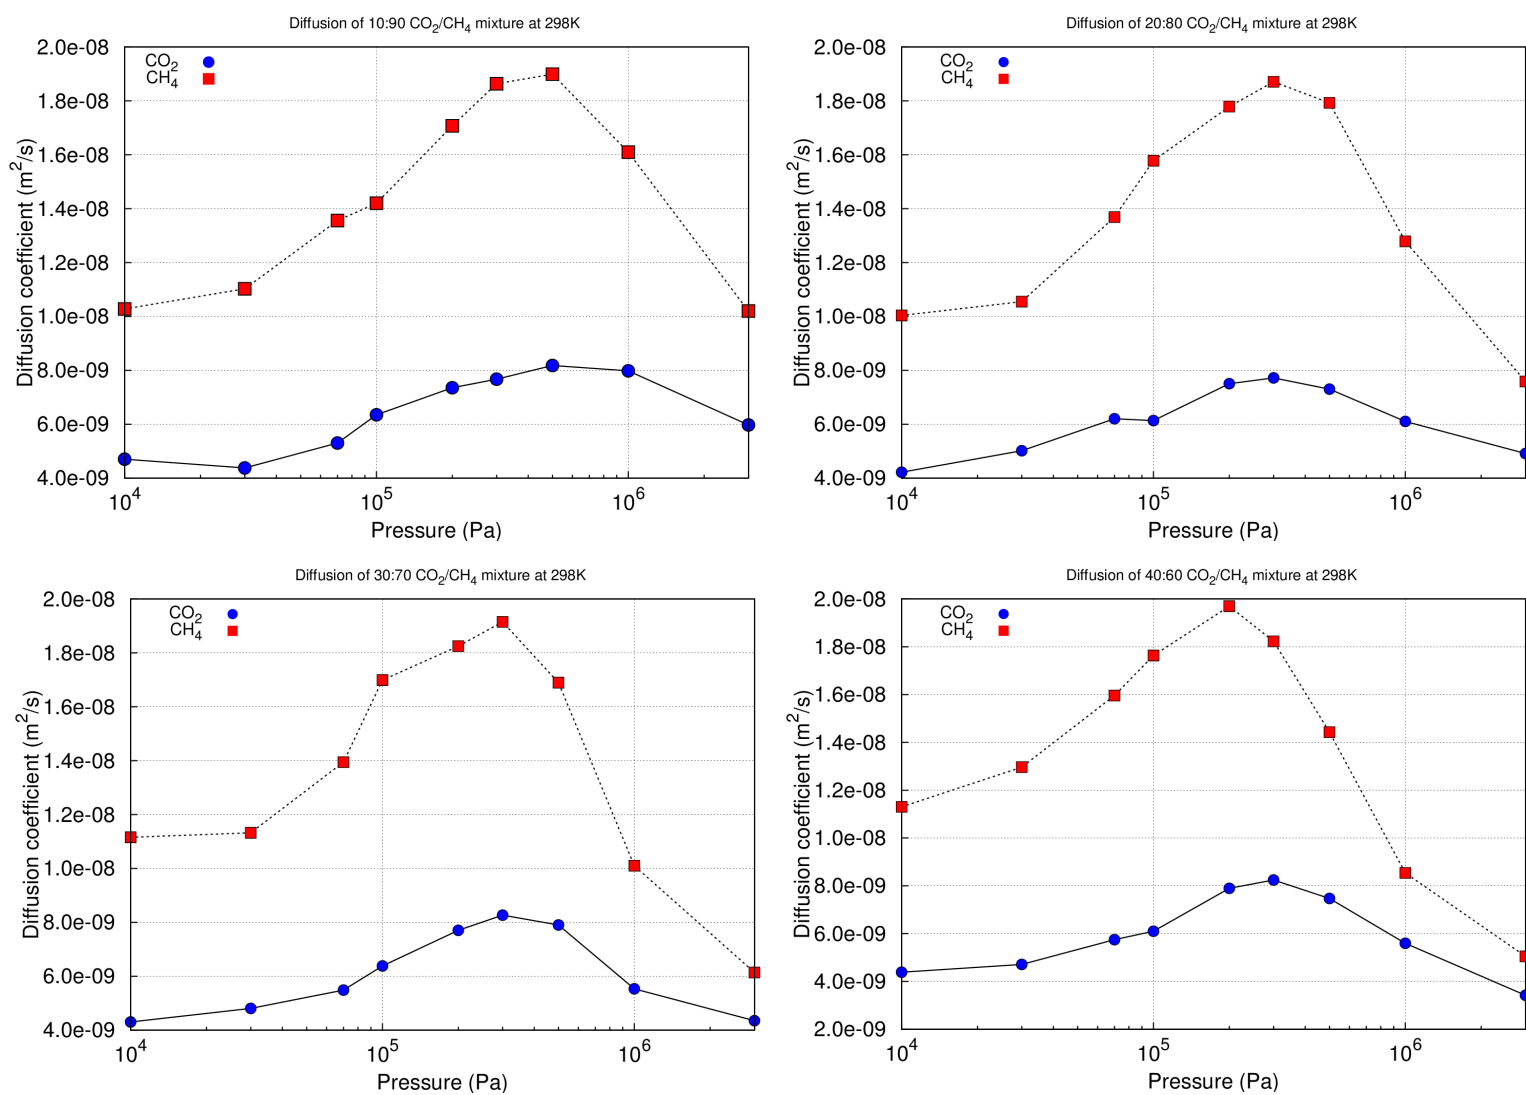

**Figure 6S.** Diffusion coefficients computed as a function of pressure in Cu-BTC for the 10:90 mixture of carbon dioxide and methane (top left), 20:80 mixture of carbon dioxide and methane (top right), 30:70 mixture of carbon dioxide and methane (bottom left), and 40:60 mixture of carbon dioxide and methane (bottom right).

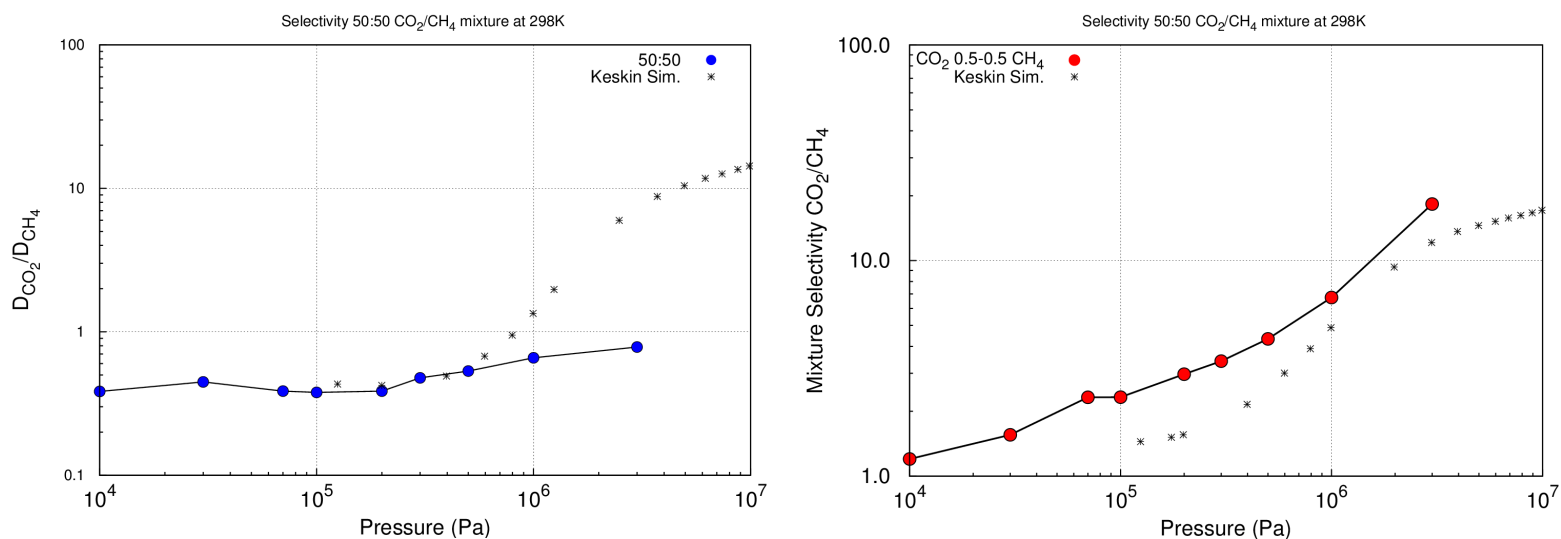

**Figure 7S.** Comparison between Diffusion selectivity (left) and Mixture selectivity (right) of this work and previous Keskin et al. results.<sup>1</sup>

### Ideal Adsorption Solution Theory

The (IAST) is analogous to Raoult's law for vapour-liquid equilibrium, i.e:

$$P_i = P_i^0(\pi_i)x_i$$

Where  $x_i$  and  $\pi_i$  are the molar fraction and spreading pressure of component  $i$  in the adsorbed phase, respectively. At the adsorption equilibrium, the reduced spreading pressures must be the same for each component and the mixture:

$$\pi_i^* = \frac{\pi_i}{RT} = \int_0^{P_i^0} \frac{n_i^0(P)}{P} dP \quad i = 1, 2, 3, \dots, N$$



$$\pi_1^* = \pi_2^* = \dots = \pi_N^* = \pi^*$$

The function  $n_i^0(P)$  is the pure component equilibrium capacity and  $P_i^0$  is the pure component hypothetical pressure which yields the same spreading pressure as that of the mixture.

By assuming ideal mixing at constant  $\pi$  and  $T$ , the total amount adsorbed,  $n_t$ , is:

$$\frac{1}{n_t} = \sum_{i=1}^N \left[ \frac{x_i}{n_i^0(P_i^0)} \right]$$

With the constraint:

$$\sum_{i=1}^N x_i = 1$$

Since the equations are nonlinear and the integrals of  $\pi_i^*$  cannot be solved analytically for most of the pure component isotherm equations, the classical IAST needs iterative integration processes.

(1) Keskin, S.; Liu, J. C.; Johnson, J. K.; Sholl, D. S. *Microporous and Mesoporous Materials* **2009**, *125*, 101.
